# Supplementary material for: Boosting alkaline water splitting efficiency: NiOOH–MnOOH heterojunctions via in situ anodic oxidation
Source: Royal Society of Chemistry journal article supplement (doi:10.1039/d4qm00512k), 2024-01-01
Supplement: d4qm00512k1.pdf [file d4qm00512k1.pdf]

## Electronic Supplementary Information

### Boosting Alkaline Water Splitting Efficiency: NiOOH-MnOOH Heterojunctions via In Situ Anodic Oxidation

Yuru Zhou<sup>a</sup>, Jing Hu<sup>\*a</sup>, Yinan Liu<sup>a</sup>, Wenyu Fan<sup>a</sup>, Panpan Tao<sup>a</sup>, Rui Yang<sup>a</sup>, Haitao Huang<sup>a</sup>, Xun Cao<sup>\*b</sup>, Haijin Li<sup>a</sup> and Siwei Li<sup>\*c</sup>

<sup>a</sup> School of Energy and Environment, Anhui University of Technology, Ma'anshan, Anhui 243002, P. R. China

<sup>b</sup> Institute of Sustainability for Chemicals, Energy and Environment (ISCE2), Agency for Science, Technology and Research (A\*STAR), 1 Pesek Road, Jurong Island, Singapore 627833, Singapore

<sup>c</sup> Institute of Industrial Catalysis, School of Chemical Engineering and Technology, Xi'an Jiaotong University, Xi'an, 710049 P. R. China

\*Corresponding authors: E-mail: [jennyhu@ahut.edu.cn](mailto:jennyhu@ahut.edu.cn) (J.H.); [Cao\\_Xun@isce2.a-star.edu.sg](mailto:Cao_Xun@isce2.a-star.edu.sg) (X.C.); [lisiwei@xjtu.edu.cn](mailto:lisiwei@xjtu.edu.cn) (S.L.)

#### Calibration of reference electrode

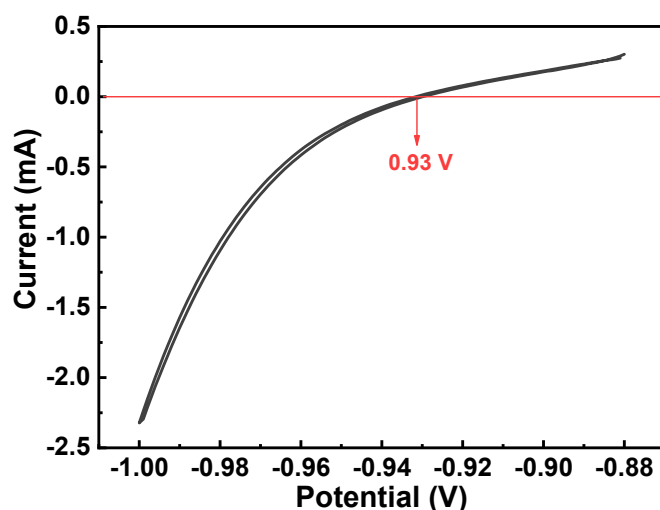

**Fig. S1** The cyclic voltammetry (CV) curve of the calibration of Hg/HgO in 1.0 M KOH.

Calibration was carried out in 1.0 M KOH solution saturated with high purity hydrogen and the working electrode was a platinum foil. As the current approaches zero, the average of the two potentials (-0.93 V) is determined as the thermodynamic potential. Thus,  $E_{(\text{RHE})}$  can be calculated by the following equation:  $E_{(\text{RHE})} = E_{(\text{Hg}/\text{HgO})} + 0.93 \text{ V}$

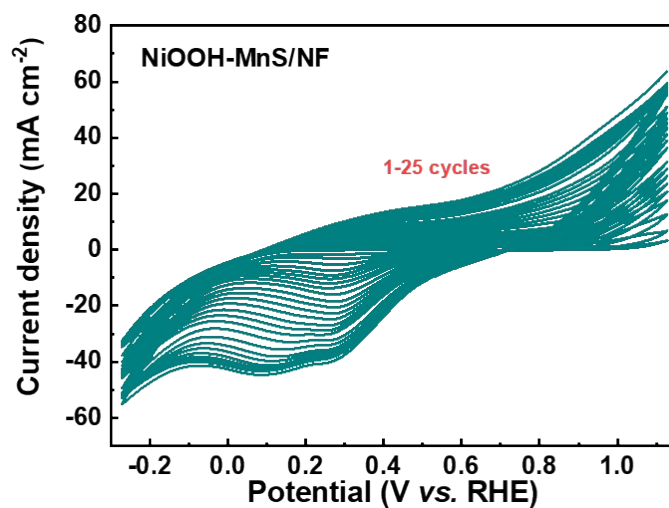

Fig. S2 Electrodeposition curve of NiOOH-MnOOH/NF sample.

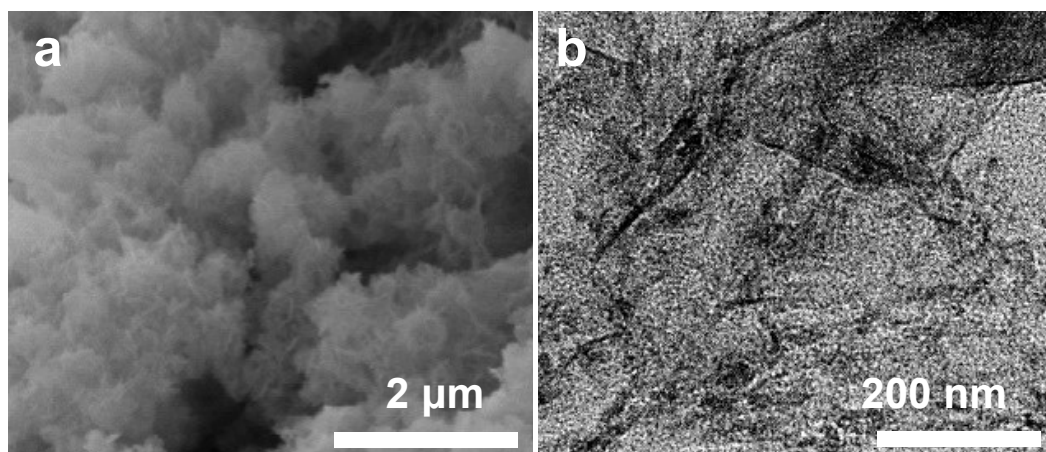

Fig. S3 (a) SEM image, (b) TEM image of  $\text{Mn}_3\text{O}_4/\text{NF}$  sample.

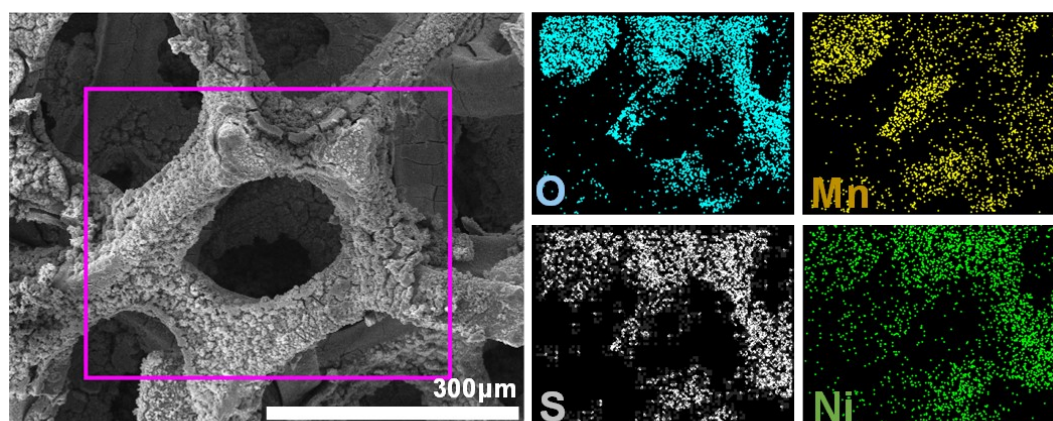

Fig. S4 Element mapping for vertically aligned NiOOH-MnS/NF.

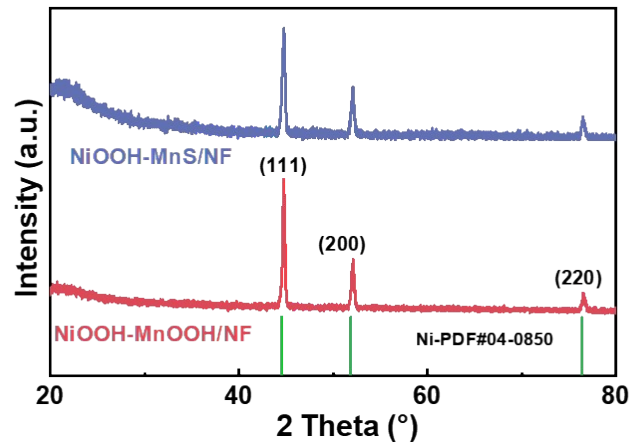

**Fig. S5** The XRD patterns of NiOOH-MnS/NF and NiOOH-MnOOH/NF samples were measured directly on Ni foam.

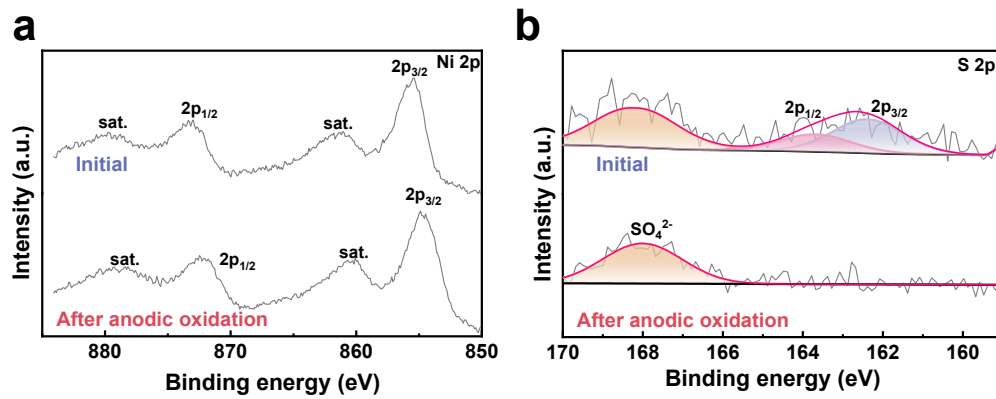

**Fig. S6** (a) Ni 2p and (b) S 2p XPS spectra of electrocatalysts before and after the anodic oxidation process.

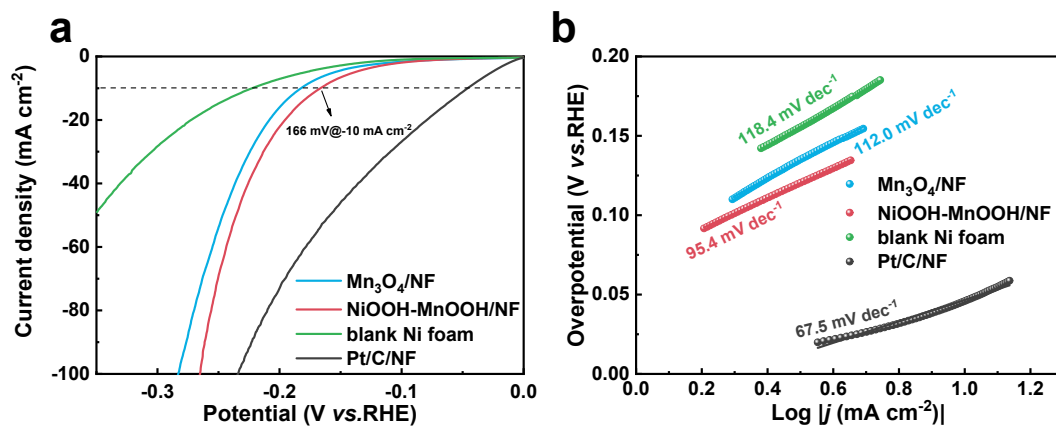

**Fig. S7** (a) HER polarization curves of the prepared samples after  $iR$  correction. (b) Tafel plots.

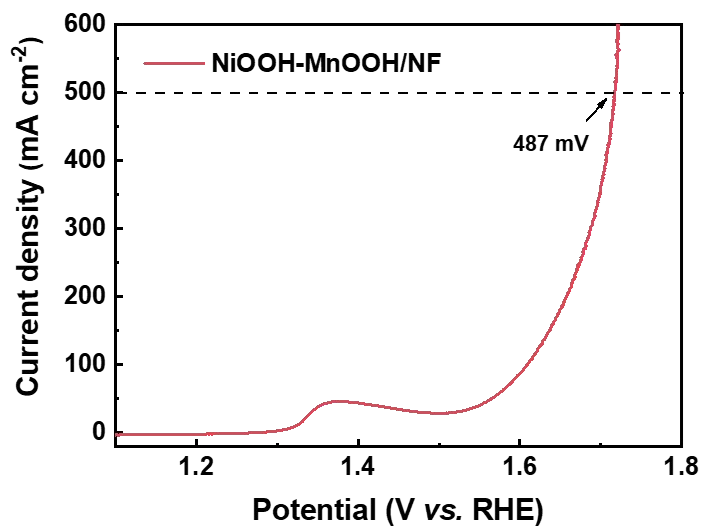

**Fig. S8** LSV curve of the samples of NiOOH-MnOOH/NF after *iR* correction at 500 mA cm<sup>-2</sup> in 1.0 M KOH.

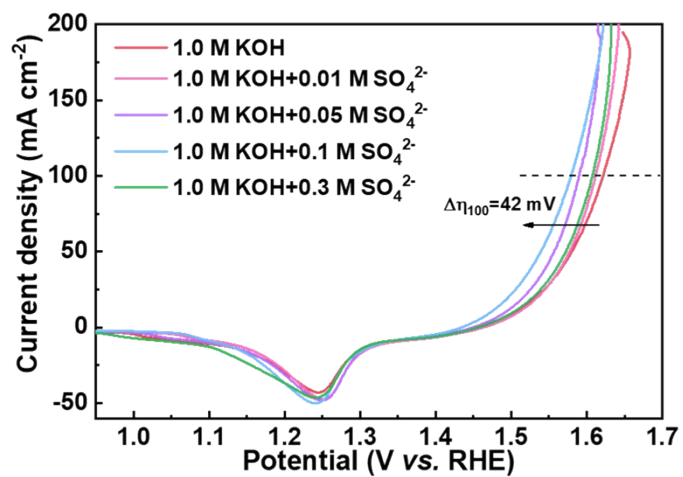

**Fig. S9** LSV curves of the sample of NiOOH-MnOOH/NF after *iR* correction in 1.0 M KOH solution added with different concentrations of SO<sub>4</sub><sup>2-</sup>.

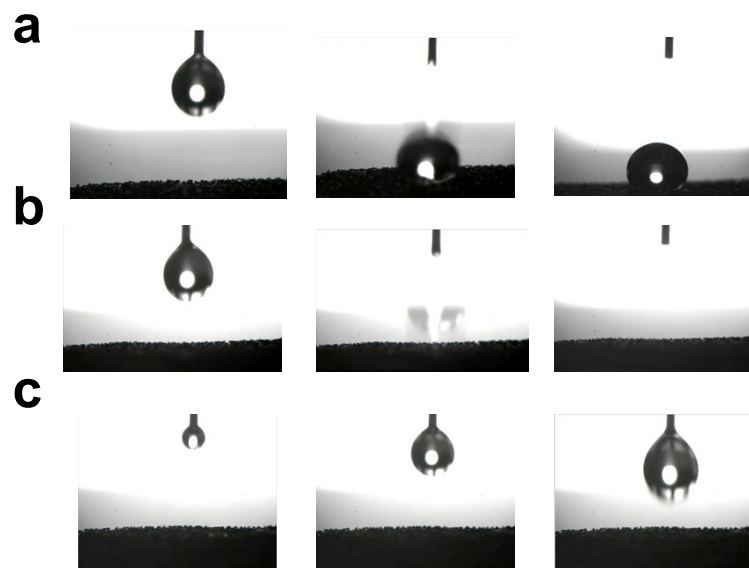

**Fig. S10** Contact angle photographs of the droplet experiment of (a) blank Ni foam, (b) NiOOH-MnS/NF, (c) NiOOH-MnOOH/NF.

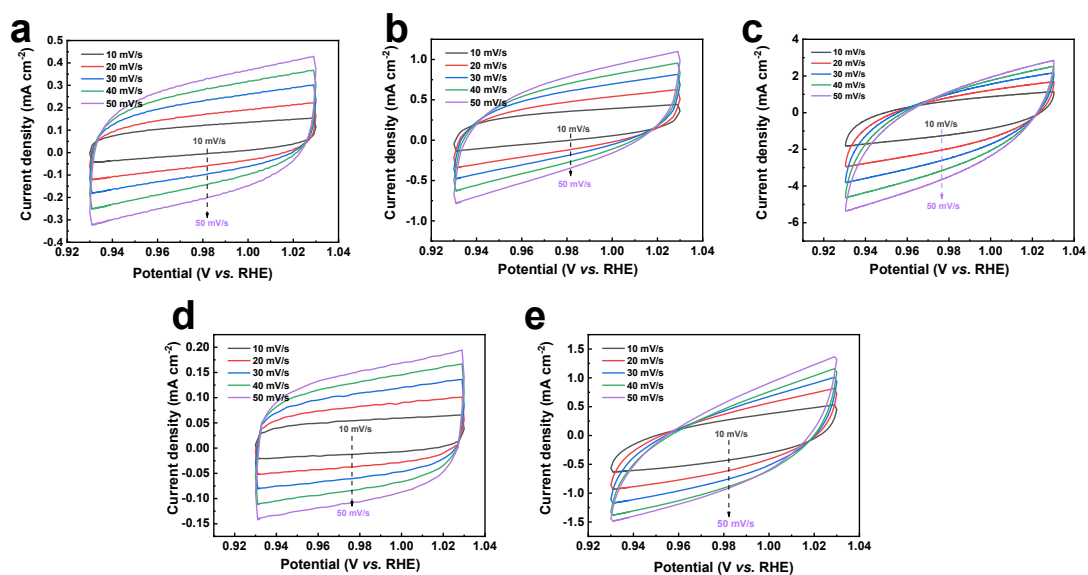

**Fig. S11** CV curves of (a)  $\text{Mn}_3\text{O}_4/\text{NF}$ , (b) NiOOH-MnS/NF, (c) NiOOH-MnOOH/NF, (d) blank Ni foam and (e)  $\text{RuO}_2/\text{NF}$  samples in 1.0 M KOH solution at different scan rates (10, 20, 30, 40 and  $50 \text{ mV s}^{-1}$ ).

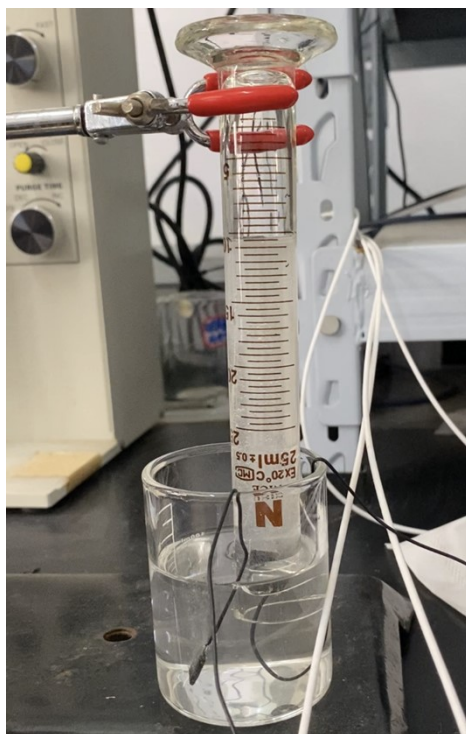

Fig. S12 Digital photographs of Faraday's efficiency.

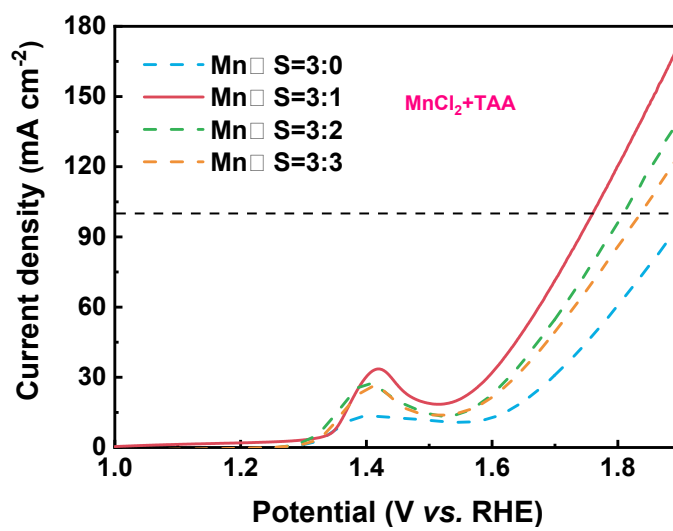

Fig. S13 LSV curves of different manganese-sulfur ratios.

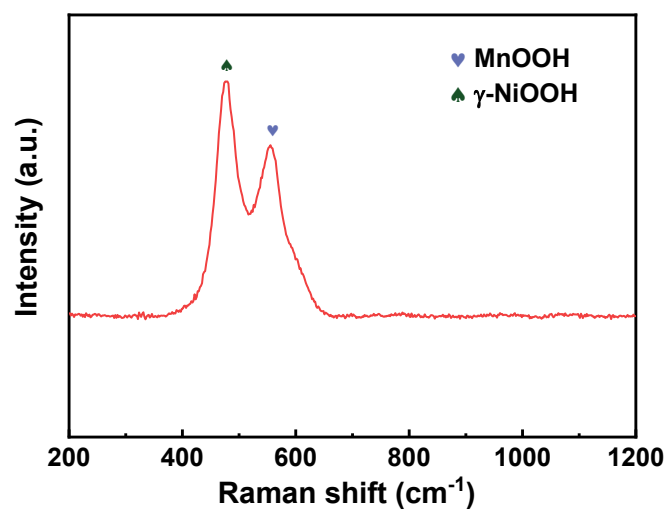

Fig. S14 Raman spectra of the samples of NiOOH-MnOOH/NF after 100 CV cycles.

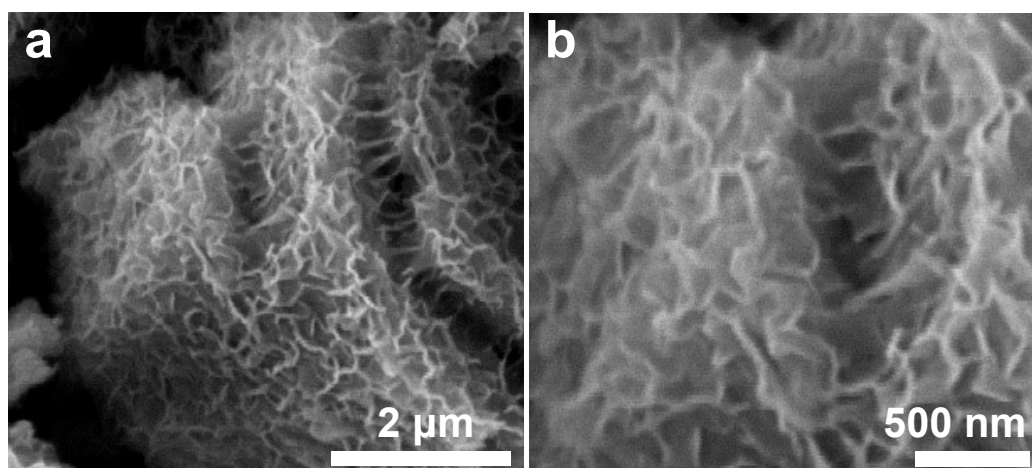

Fig. S15 SEM images of samples of NiOOH-MnOOH/NF after 100 CV cycles.

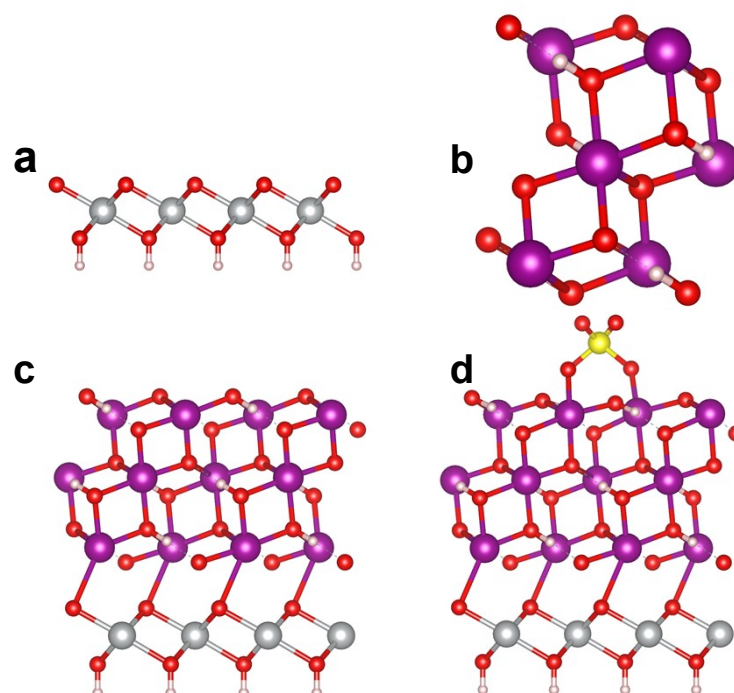

**Fig. S16** Atomic model of (a) NiOOH, (b) MnOOH, (c) NiOOH-MnOOH, (d) NiOOH-MnOOH-SO<sub>4</sub><sup>2-</sup>. The gray, purple, red, pink, and yellow balls represent Ni, Mn, O, H, and S atoms, respectively.

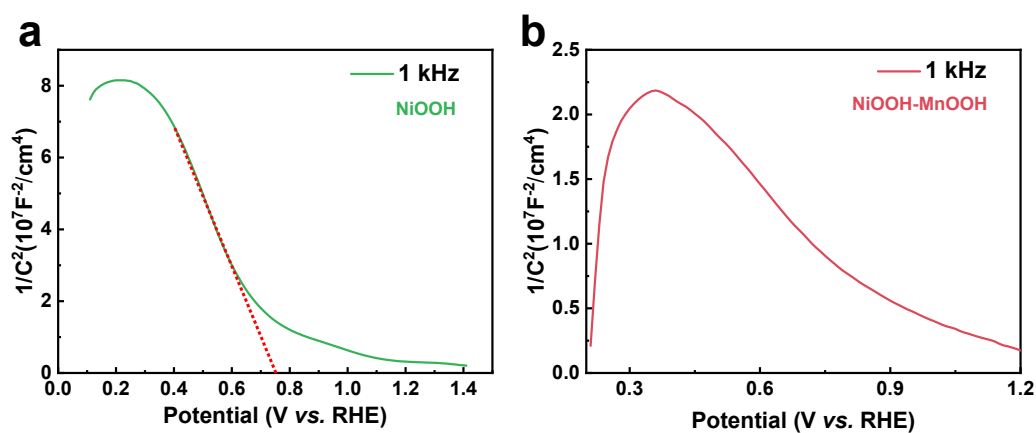

**Fig. S17** Mott-Schottky curves of (a) NiOOH and (b) NiOOH-MnOOH. (The electrolyte is 0.5 M Na<sub>2</sub>SO<sub>4</sub> solution)

The structural type of the catalyst was inquired by the Mott-Schottky (M-S) test to research the structure of the catalyst. Upon analysis of the tested M-S curves, it was shown that the negative slope of the curve for NiOOH corresponded to a p-type semiconductor. The M-S plot of NiOOH-MnOOH after anodic oxidation showed an inverted “V” shape with positive and negative slopes, indicating that a p-n interface was formed on the surface of the catalyst, which constituted a p-n heterostructure.<sup>16</sup>



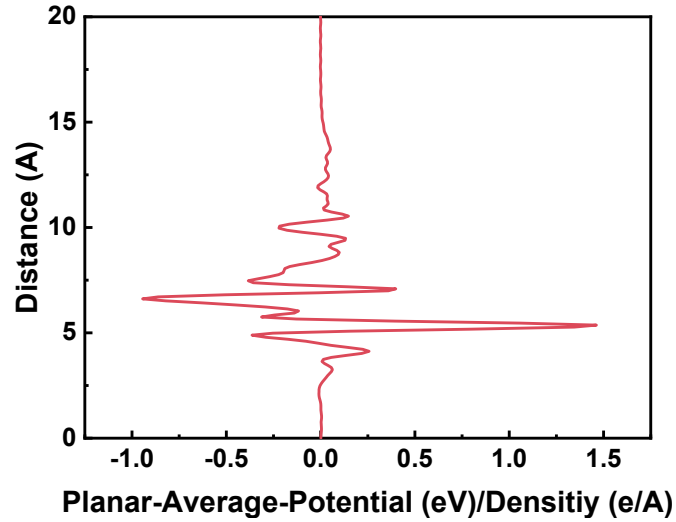

**Fig. S18** Plane-averaged charge density difference  $\Delta\rho(x)$  of NiOOH-MnOOH-SO<sub>4</sub><sup>2-</sup> along the z direction normal to the surface.

**Table S1-4:**

**Table S1.** Comparison of the OER performance for NiOOH-MnOOH/NF with other related electrocatalysts.

| Catalysts                                  | $\eta_{10}$<br>(mV) | $\eta_{100}$<br>(mV) | Tafel slop<br>(mV dec <sup>-1</sup> ) | Ref       |
|--------------------------------------------|---------------------|----------------------|---------------------------------------|-----------|
| NiOOH-MnOOH/NF                             | 276                 | 391                  | 52.3                                  | This work |
| MnOOH@CDs <sub>0.2</sub>                   | 302                 |                      | 51.3                                  | 1         |
| $\gamma$ -MnOOH/NF                         | 355                 |                      | 283                                   | 2         |
| $\beta$ -MnOOH/NF                          | 395                 | 543                  | 87                                    | 3         |
| Ni-MnO/rGO                                 | 370                 |                      | 67                                    | 4         |
| NS-MnO <sub>2</sub>                        | 320                 |                      | 40                                    | 5         |
| MnO <sub>2</sub> -CoP <sub>3</sub>         | 288                 |                      | 60                                    | 6         |
| Ni <sup>2+</sup> /MnO <sub>2</sub>         | 400                 |                      | 72                                    | 7         |
| Ni-MnS                                     | 349                 | 450                  | 87                                    | 8         |
| CoMnNiS                                    | 371                 | 440                  | 48.2                                  | 9         |
| Co/Co <sub>9</sub> S <sub>8</sub> /MnS-NMC | 330                 | 420                  | 55.1                                  | 10        |
| $\gamma$ -MnOOH/CoOOH                      | 313                 | 390                  | 87                                    | 11        |
| CoMn LDH                                   | 350                 |                      | 43                                    | 12        |
| MnO <sub>2</sub> -NiO                      | 379                 |                      | 47.8                                  | 13        |

|                                                      |     |      |    |
|------------------------------------------------------|-----|------|----|
| NiMnO <sub>3</sub> /NiMn <sub>2</sub> O <sub>4</sub> | 380 | 73.3 | 14 |
| CoMn <sub>2</sub> O <sub>4</sub>                     | 310 | 93.5 | 15 |

**Table S2.** The free energy change ( $\Delta G$ ) of each elementary reaction for OER on different catalysts at  $U = 0$  V.

| Models                                    | $\Delta G_1$ (eV) | $\Delta G_2$ (eV) | $\Delta G_3$ (eV) | $\Delta G_4$ (eV) |
|-------------------------------------------|-------------------|-------------------|-------------------|-------------------|
| NiOOH                                     | 2.21              | 0.76              | 2.33              | -0.38             |
| MnOOH                                     | 0.33              | 1.26              | 2.07              | 1.27              |
| NiOOH-MnOOH                               | 0.03              | 1.25              | 1.86              | 1.79              |
| NiOOH-MnOOH-SO <sub>4</sub> <sup>2-</sup> | 0.22              | 1.68              | 1.27              | 1.75              |

**Table S3.** The free energy change ( $\Delta G$ ) of each elementary reaction for OER on different catalysts at  $U = 1.23$  V.

| Models                                    | $\Delta G_1$ (eV) | $\Delta G_2$ (eV) | $\Delta G_3$ (eV) | $\Delta G_4$ (eV) |
|-------------------------------------------|-------------------|-------------------|-------------------|-------------------|
| NiOOH                                     | 0.98              | -0.47             | 1.10              | -1.61             |
| MnOOH                                     | -0.90             | 0.03              | 0.84              | 0.04              |
| NiOOH-MnOOH                               | -1.20             | 0.02              | 0.63              | 0.56              |
| NiOOH-MnOOH-SO <sub>4</sub> <sup>2-</sup> | -1.01             | 0.45              | 0.04              | 0.52              |

**Table S4.** Bader charges (in the unit  $e^-$ ) for Mn and Ni atoms in the NiOOH, MnOOH, NiOOH-MnOOH, hetero-structured NiOOH-MnOOH-SO<sub>4</sub><sup>2-</sup>

| Bader charge                              | Ni    | Mn     |
|-------------------------------------------|-------|--------|
| NiOOH                                     | 0     |        |
| MnOOH                                     |       | 0      |
| NiOOH-MnOOH                               | 0.051 | -0.001 |
| NiOOH-MnOOH-SO <sub>4</sub> <sup>2-</sup> | 0.050 | -0.035 |

**Note:** Setting the charges of Ni and Mn in pure NiOOH and MnOOH to 0 to compare the electron gains and losses after the formation of heterojunctions

## References

- 1 L. Tian, X. Zhai, X. Wang, X. Pang, J. Li and Z. Li, Morphology and phase transformation of  $\alpha$ -MnO<sub>2</sub>/MnOOH modulated by N-CDs for efficient electrocatalytic oxygen evolution reaction in alkaline medium, *Electrochim. Acta*, 2020, **337**.
- 2 S.-B. Wang, Y.-S. Xia, Z.-F. Xin and L.-X. Xu, Fabrication of the novel NiFe-LDHs @ $\gamma$ -

MnOOH nanorod electrocatalyst for effective water oxidation, *Catal. Commun.*, 2023, **173**.

3 C. Walter, S. Kalra, R. Beltrán-Suito, M. Schwarze, P. W. Menezes and M. Driess, Manganese sulfide enables the formation of a highly active  $\beta$ -MnOOH electrocatalyst for effective alkaline water oxidation, *Mater. Today Chem.*, 2022, **24**.

4 G. Fu, X. Yan, Y. Chen, L. Xu, D. Sun, J. M. Lee and Y. Tang, Boosting bifunctional oxygen electrocatalysis with 3D graphene aerogel-supported Ni/MnO particles, *Adv. Mater.*, 2017, **30**.

5 Y. Zhao, C. Chang, F. Teng, Y. Zhao, G. Chen, R. Shi, G. I. N. Waterhouse, W. Huang and T. Zhang, Defect-engineered ultrathin  $\delta$ -MnO<sub>2</sub> nanosheet arrays as bifunctional electrodes for efficient overall water splitting, *Adv. Energy Mater.*, 2017, **7**.

6 X. Xiong, Y. Ji, M. Xie, C. You, L. Yang, Z. Liu, A. M. Asiri and X. Sun, MnO<sub>2</sub>-CoP<sub>3</sub> nanowires array: An efficient electrocatalyst for alkaline oxygen evolution reaction with enhanced activity, *Electrochem. Commun.*, 2018, **86**, 161-165.

7 A. C. Thenuwara, E. B. Cerkez, S. L. Shumlas, N. H. Attanayake, I. G. McKendry, L. Frazer, E. Borguet, Q. Kang, R. C. Remsing, M. L. Klein, M. J. Zdilla and D. R. Strongin, Nickel confined in the interlayer region of birnessite: an active electrocatalyst for water oxidation, *Angew. Chem. Int. Edit.*, 2016, **55**, 10381-10385.

8 G. A. Tigwere, M. D. Khan, L. D. Nyamen, F. M. de Souza, W. Lin, R. K. Gupta, N. Revaprasadu and P. T. Ndifon, Transition metal (Ni, Cu and Fe) doped MnS nanostructures: Effect of doping on supercapacitance and water splitting, *Mat. Sci. Semicon. Proc.*, 2023, **158**.

9 M. Verma, L. Sinha and P. M. Shirage, Electrodeposited nanostructured flakes of cobalt, manganese and nickel-based sulfide (CoMnNiS) for electrocatalytic alkaline oxygen evolution reaction (OER), *J. Mater. Sci-Mater. El.*, 2021, **32**, 12292-12307.

10 K. Chen, X. Wang, C. Zhang, R. Xu, H. Wang, L. Chu and M. Huang, Three-phases Co/Co<sub>9</sub>S<sub>8</sub>/MnS heterostructures engineering for boosted ORR/OER activities in Zn-air batteries, *Mater. Today Energy*, 2022, **30**.

11 M. Cui, H. Zhao, X. Dai, Y. Yang, X. Zhang, X. Luan, F. Nie, Z. Ren, Y. Dong, Y. Wang, J. Yang and X. Huang, Promotion of the electrocatalytic oxygen evolution reaction by chemical coupling of CoOOH particles to 3D branched  $\gamma$ -MnOOH rods, *Acs Sustain. Chem. Eng.*, 2019, **7**, 13015-13022.

12 F. Song and X. Hu, Ultrathin cobalt-manganeselayered double hydroxide is an efficient oxygen evolution catalyst, *J. Am. Chem. Soc.*, 2014, **136**, 16481-16484.

13 S. P. Mooni, K. K. Kondamareddy, S. Li, X. Zhou, L. Chang, X. Ke, X. Yang, D. Li and Q. Qu, Graphene oxide decorated bimetal (MnNi) oxide nanoflakes used as an electrocatalyst for enhanced oxygen evolution reaction in alkaline media, *Arab. J. Chem.*, 2020, **13**, 4553-4563.

14 X. He, F. Yin, Y. Li, H. Wang, J. Chen, Y. Wang and B. Chen, NiMnO<sub>3</sub>/NiMn<sub>2</sub>O<sub>4</sub> oxides synthesized via the aid of pollen: Ilmenite/Spinel hybrid nanoparticles for highly efficient bifunctional oxygen electrocatalysis, *Acs Appl. Mater. Inter.*, 2016, **8**, 26740-26757.

15 A. Bahadur, W. Hussain, S. Iqbal, F. Ullah, M. Shoaib, G. Liu and K. Feng, A morphology controlled surface sulfurized CoMn<sub>2</sub>O<sub>4</sub> microspike electrocatalyst for

water splitting with excellent OER rate for binder-free electrocatalytic oxygen evolution, *J. Mater. Chem. A*, 2021, **9**, 12255-12264.

16 G. Fang, X. Ji, H. Shi, C. Zhang, Z. Guo, T. Tang and W. Liu, Constructing built-in electric field in 3D core-shell p-n heterostructure of NiFe-LDH nanosheets modified Cr-doped Ni<sub>3</sub>S<sub>2</sub> nanofibers for efficient and stable oxygen evolution reaction, *J. Alloy. Compd.*, 2024, **970**, 172583.
